**TITLE:** IMMEDIATE VENTILATORY SUPPORT AFTER BUPIVACAINE-INDUCED APNEA PREVENTS CV COLLAPSE IN ANESTHETIZED RATS.

**AUTHORS:** A.A. Lina, M.D., P.J. Dauchot, M.D., A.H. Anton, PhD., R. Jezeski, B.S.

**AFFILIATION:** University Hospitals of Cleveland, Dept. of Anesthesiology and Case Western Reserve University Medical School, Cleveland, OH 44106.

**Introduction:** Apnea (A) is one of the major signs of Bupivacaine (B) toxicity that often if not always precedes CV collapse. We investigated in anesthetized rats if ventilatory support (Vent) provided immediately after A altered subsequent hemodynamics and outcome.

**METHODS:** Sixteen Sprague-Dawley rats, weighing 432 to 520 g, received 50 mg/kg intraperitoneal pentobarbital, had tracheotomy, catheterization of an IJV for fluid/drug administration and retrograde catheterization of the left carotid artery for placement of a 2 mm Millar transducer-catheter in the aorta (Ao) for the measurement of SBP, DBP and peak Ao dP/dt. Heart rate (HR) was obtained from the ECG. All rats received 5-min spaced cumulative IV doses of 1 (B<sub>1</sub>), 2 (B<sub>2</sub>), and 4 (B<sub>4</sub>) mg/kg of B and were randomly assigned to receive Vent (Harvard Rodent ventilator, 90 rpm) about 5 sec following A (Group V, n=8) or not to receive Vent (Group S, n=8). High speed recordings (Gould) were made before B<sub>1</sub> (Co), at A and 4 min following the B dose that had caused A (B<sup>A.4</sup>). Data analysis included

ANOVA, unpaired t test and Fisher's Exact Test (FET).

**RESULTS:** Mean values and SEM are listed in the table. A occurred after B<sub>2</sub> in 2/8 rats in both groups and at B<sub>4</sub> in 5/8 rats of group S and 6/8 rats of group V. After A, HR, SBP and DBP were lower than at Co in both groups. The rat of group S that did not have A did not have hypotension and survived. All other rats (7/8) of group S died. All rats in group V survived (P<0.01 by FET). At B<sup>A.4</sup>, their HR was still lower than at Co but their SBP, DBP and peak Ao dP/dt were no longer statistically different from Co.

**DISCUSSION:** CV collapse appears to be intimately dependent on B-induced A. Preliminary arterial blood gas data obtained in the post-A period indicate that acid-base abnormalities may be strong determinants of subsequent CV collapse.

|                          |   | Co       | A                      | B <sup>A.4</sup>         |
|--------------------------|---|----------|------------------------|--------------------------|
| HR (bpm)                 | S | 442±7.4  | 226±32.2 <sup>c</sup>  | 75±31.1 <sup>c,A</sup>   |
|                          | V | 426±17   | 220±30 <sup>c</sup>    | 319±25 <sup>c,A,B</sup>  |
| SBP (mm Hg)              | S | 151±7.8  | 73±9.8 <sup>c</sup>    | 16.2±12.1 <sup>c,A</sup> |
|                          | V | 141±11.3 | 101±10.2 <sup>c</sup>  | 130±11 <sup>c,B</sup>    |
| DBP (mm Hg)              | S | 120±5.9  | 38±8.2 <sup>c</sup>    | 12±10.4 <sup>c,A</sup>   |
|                          | V | 111±10.3 | 70.4±11.4 <sup>c</sup> | 9.7±11 <sup>c,B</sup>    |
| peak Ao dP/dt (mmHg/sec) | S | 1250±124 | 1250±184               | 225±149 <sup>c,A</sup>   |
|                          | V | 1550±82  | 1437±94                | 1362±103 <sup>B</sup>    |

G: p < 0.01 compared to Co, a and A, p < 0.05 and p < 0.01 compared to apnea by Newman-Keuls test.

S: p < 0.01 compared to group S by unpaired t-tests.

## A846

**TITLE:** SPINAL ANESTHESIA AND MIDAZOLAM EXERT ANTAGONISTIC EFFECTS ON CO<sub>2</sub> RESPONSE

**AUTHORS:** RA Gauthier, MD; F Chung, MD; B Dyck, MD; J Romanelli, BS; KR Chapman, MD

**AFFILIATION:** Anesthesia Department, University of Toronto, Toronto Western Division, Toronto Hospital

Spinal anesthesia (Sa) has been associated with cardiac arrest in healthy patients.<sup>1</sup> Deafferentation of the chest wall by Sa<sup>2</sup> combined with sedative medication may interact to alter the ventilatory response to CO<sub>2</sub>.

With institution approval and informed consent, 19 ASA I subjects (8F, 12M) aged 19-38 completed CO<sub>2</sub> rebreathing experiments (Read's technique<sup>3</sup>) under 4 conditions: Baseline (B), Midazolam (M), Spinal Anesthesia (SA) and Spinal Anesthesia plus Midazolam (SA+M). Ventilation was also monitored noninvasively during rest using respiratory inductance plethysmography (RIP).

Ten subjects received 0.075 mg/kg and 9, 0.050mg/kg midazolam in M and SA + M. Mean anesthesia level in SA and SA + M was T5 (T3-T8). Response to CO<sub>2</sub> decreased in both M and SA (p < .05). The combination (SA + M) resulted in an antagonistic effect and a smaller decrease than either individually. The relationship between minute ventilation and ET/CO<sub>2</sub> was more variable after sedation with midazolam and was most variable in SA + M. The use of midazolam in either

M or SA + M led to a decrease in tidal volume and increase in respiratory rate (p < .02). As a result, minute ventilation was reduced in SA + M (p < .05). SA resulted in an increase in VT, decrease in rate, but a subsequent increase in MV. Mean inspiratory flow rate, an index of respiratory drive, was decreased in M and SA + M but increased in SA (p < .02).

|                               | CONDITION |        |        |        |
|-------------------------------|-----------|--------|--------|--------|
|                               | B         | M      | SA     | SA+M   |
| SLOPE(L/M/mmCO <sub>2</sub> ) | 2.76      | 2.36*  | 2.37*  | 2.53   |
| R SQUARED SLOPE               | 0.79      | 0.65** | 0.74   | 0.60** |
| VT (L)                        | 0.56      | 0.40** | 0.74** | 0.40** |
| RATE                          | 14.8      | 17.0** | 12.7** | 15.1*  |
| MV (L/M)                      | 6.93      | 6.36   | 7.81*  | 5.63*  |
| MIFR (L/S)                    | 0.32      | 0.25** | 0.40** | 0.24** |
| RIB%                          | 47.9      | 61.4** | 43.1   | 65.8** |

\* p < 0.05

\*\* p < 0.02

There was a significant interaction between midazolam and Sa on CO<sub>2</sub> ventilatory response. However, when combined in SA + M there was an antagonistic rather than synergistic effect on CO<sub>2</sub> response.

## REFERENCES

1. Caplan RA, et al. Anesthesiology 1988; 68:5-11.
2. Steinbrook RA, et al. Anesth & Analg 1988; 67:247-252.
3. Read DJC and Leigh J. J Appl Physiol 1967; 23:53-70.
